# Supplementary material for: Thermal desorption of hydrogen from ammonia borane: unexpected role of homopolar B–H⋯H–B interactions
Source: Royal Society of Chemistry journal article supplement (doi:10.1039/c2cc16111g), 2012-01-01
Supplement: c2cc16111g.pdf [file c2cc16111g.pdf]

# Supporting information

for the manuscript

## Thermal desorption of hydrogen from ammonia borane: unexpected role of homopolar B-H...H-B interactions

David J. Wolstenholme\*, Kyle T. Traboulee, Ye Hua, Larry A. Calhoun, and

G. Sean McGrady\*

Department of Chemistry  
University of New Brunswick  
Fredericton, N.B.  
E3B 5A3  
Canada

Phone: 1-506-452-6340

Fax: 1-506-453-4981

E-mail: [dwolsten@unb.ca](mailto:dwolsten@unb.ca) and [smcgrady@unb.ca](mailto:smcgrady@unb.ca)

|             |                                                                                         |           |
|-------------|-----------------------------------------------------------------------------------------|-----------|
| <b>S1</b>   | <b>Experimental Methods .....</b>                                                       | <b>S3</b> |
| <b>S1.1</b> | <b>General Considerations .....</b>                                                     | <b>S3</b> |
| <b>S1.2</b> | <b>Synthesis of ND<sub>3</sub>BH<sub>3</sub> and NH<sub>3</sub>BD<sub>3</sub> .....</b> | <b>S3</b> |
| <b>S1.3</b> | <b>Hydrogen Desorption Experiments .....</b>                                            | <b>S4</b> |
| <b>S1.4</b> | <b>Thermogravimetric Analysis (TGA) Experiments .....</b>                               | <b>S4</b> |

## S1 Experimental Methods

### S1.1 General Considerations

All manipulations were carried out under an inert atmosphere in a nitrogen filled drybox or using an argon Schlenk line. Unless otherwise noted, all reagents were purchased from commercial sources (Sigma Aldrich) and used without further purification. The THF was purified using a Seca Solvent Dispensing System, followed by vigorous sparging with argon, and stored over molecular sieves (4 Å). Solution  $^1\text{H}$  and  $^2\text{H}$  NMR spectra were acquired using Varian Unity INOVA (300 MHz or 400 MHz) spectrometers at 298 K. The reported chemical shifts are presented in parts per million (ppm); in which the  $^1\text{H}$  NMR spectra were referenced to residual  $^1\text{H}$  nuclei in the deuteriated solvent, while the  $^2\text{H}$  NMR spectra were referenced to residual  $^2\text{H}$  nuclei in the non-deuteriated solvent. The TGA plots were acquired using a TGA $Q_{50}$  instrument.

### S1.2 Synthesis of $\text{ND}_3\text{BH}_3$ and $\text{NH}_3\text{BD}_3$

$\text{ND}_3\text{BH}_3$  (0.10 g, 3.0 mmol) was prepared according to literature methods,<sup>1</sup> in which a sample of  $\text{NH}_3\text{BH}_3$  (0.10 g, 3.24 mmol) was washed in excess  $\text{D}_2\text{O}$ . The  $\text{NH}_3\text{BD}_3$  derivative (0.47 g, 13.9 mmol) was synthesized through a direct 1:1 reaction between  $\text{NaBD}_4$  (0.62 g, 14.8 mmol) and  $(\text{NH}_4)_2\text{SO}_4$  (1.95 g, 14.8 mmol).<sup>2</sup> These reactions were allowed to stir until no residual  $\text{NH}_3$  or  $\text{BH}_3$  peaks were observed in the corresponding  $^1\text{H}$  NMR spectra (Figure S1).

1. A.T. Luedtke, T. Autrey, *Inorg. Chem.*, 2010, **49**, 3905-3910.
2. P.V. Ramachandran, P. Gagare, *Inorg. Chem.*, 2007, **46**, 7810-7817.

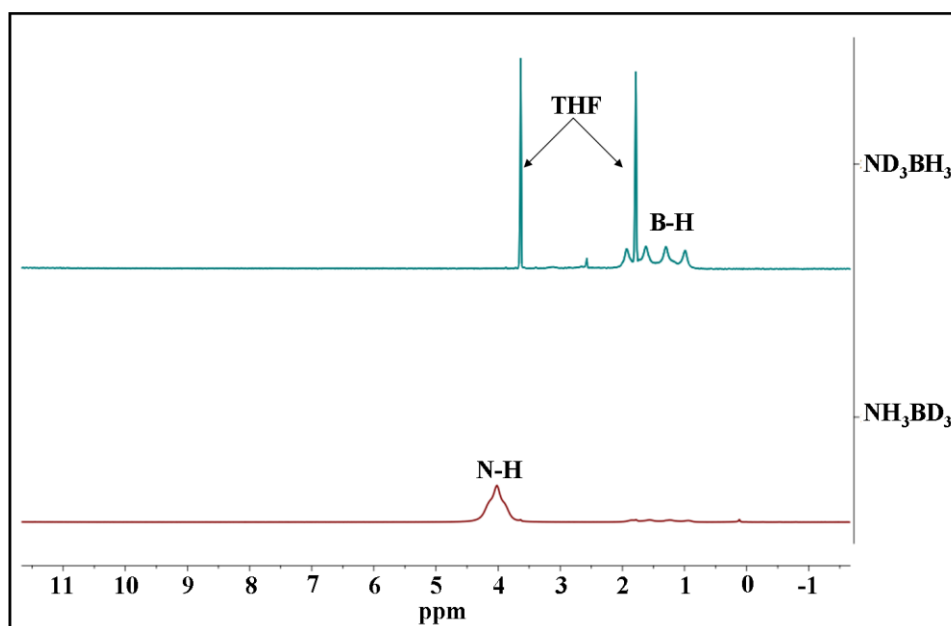

**Figure S1.**  $^1\text{H}$  NMR spectrum of  $\text{ND}_3\text{BH}_3$  (top) and  $\text{NH}_3\text{BD}_3$  (bottom) in  $\text{THF-}d_8$

### S1.3 Hydrogen desorption experiments

Small amounts of solid  $\text{ND}_3\text{BH}_3$  and  $\text{NH}_3\text{BD}_3$  (~10-20 mg) were placed in separate 5 mm NMR tube each equipped with a Teflon valve (J. Young), followed by the addition of toluene- $d_8$  (1 mL) for  $\text{ND}_3\text{BH}_3$  and non-deuteriated toluene (1 mL) for  $\text{NH}_3\text{BD}_3$ . The NMR tube was then placed into an oil bath and heated in 20 °C increments (60-120 °C) in 20 min stages. The  $^1\text{H}$  and  $^2\text{D}$  NMR spectra were recorded after each increment.

### S1.4 Thermogravimetric analysis (TGA) experiments

TGA plots were obtained by loading separate sample holders with 2.5-7 mg of  $\text{ND}_3\text{BH}_3$  and  $\text{NH}_3\text{BD}_3$  in a nitrogen-filled drybox.  $\text{NH}_3\text{BD}_3$  in particular displayed a high tendency to plume on account of the exothermic nature of hydrogen desorption. Accordingly, the lower limit used for this sample was ~2.5 mg. These samples were each heated to 300 °C at a ramping rate of 2 °C/min.
